# Supplementary material
Source: PubMed Central journal article supplement (PMC4010117)
Supplement: NIHMS562267-supplement-02.pdf [file NIHMS562267-supplement-02.pdf]

## SUPPLEMENTARY TABLES

**Table S1, related to Figure 2.** Major gross pathologies identified at necropsy.

|                           |                    | <b>SD (87)</b> | <b>SRT1720 (87)</b> |
|---------------------------|--------------------|----------------|---------------------|
| Mean age of death (weeks) |                    | 112            | 121                 |
| Liver                     | Steatosis          | 9.2%           | 3.4%                |
|                           | Hepatocarcinoma    | 26.4%          | 38.6%               |
| Kidneys                   | Enlarged           | 4.6%           | 3.4%                |
|                           | Glomerulonephritis | 17.2%          | 18.2%               |
| Spleen                    | Enlarged           | 33.3%          | 46.6% <sup>#</sup>  |
| Heart                     | Enlarged           | 9.2%           | 3.4%                |
|                           | Ischemic foci      | 6.9%           | 6.8%                |

The percentage of mice with various pathologies is represented. SD, standard diet.

<sup>#</sup> p = 0.09 comparing SD- to SRT1720-treated mice using Fisher's Exact Test.

**Table S2, related to Figure 2.** Blinded histopathological scoring of mice at sacrifice.

|               |                         | <b>SD</b>       | <b>SRT1720</b>   |
|---------------|-------------------------|-----------------|------------------|
| <b>Liver</b>  | Lymphocyte infiltration | 1.0 ± 0.0 (4/6) | 1.0 ± 0.0 (2/8)  |
|               | Steatosis               | 2.3 ± 0.3 (4/6) | 1.0 ± 0.0 (2/8)* |
| <b>Kidney</b> | Lymphocyte infiltration | 1.6 ± 0.3 (5/5) | 1.9 ± 0.4 (8/8)* |
|               | Glomerulonephritis      | 1.2 ± 0.5 (3/5) | 1.0 ± 0 (8/8)    |
| <b>Heart</b>  | Lesion                  | 0 (0/6)         | 0 (0/8)          |
| <b>Spleen</b> | Congestion              | 6 (6/6)         | 7 (7/8)          |

Lymphocyte infiltration and fatty change (steatosis) are scored on a scale of 1-4 (most severe); data is mean ± SEM (%). Heart and spleen data is represented as number of cases. n=6 SD, n=8 SRT1720 (76 weeks age, 38 weeks on diet). \* p < 0.05 comparing SD- to SRT1720-treated mice using Fisher's Exact Test.

**Table S3, related to Figure 3.** List of the ten most highly up-regulated and down-regulated genes in liver and muscle in response to SRT1720 treatment in SD-fed mice.

| <b>Liver</b>  |                               | <b>Muscle</b>  |                               |
|---------------|-------------------------------|----------------|-------------------------------|
| <b>Gene</b>   | <b>(zratio)<br/>SD1720:SD</b> | <b>Gene</b>    | <b>(zratio)<br/>SD1720:SD</b> |
| Socs2         | 18.05                         | Cish           | 19.45                         |
| Cish          | 13.38                         | Chac1          | 18.54                         |
| Slc25a30      | 13.03                         | Clec2d         | 6.69                          |
| Serpina4-ps1  | 12.76                         | Ddp            | 6.10                          |
| Hhex          | 11.21                         | Pik3ip1        | 6.07                          |
| Txnip         | 11.17                         | Car3           | 5.71                          |
| Rgs16         | 10.36                         | Cntnap2        | 5.67                          |
| Ctgf          | 10.14                         | Bhlhb2         | 5.60                          |
| Chrna4        | 8.95                          | Hist1h4j       | 5.25                          |
| Cyp1a2        | 8.94                          | Bel6b          | 5.09                          |
| Rcan1         | -10.07                        | 1190002H23Rik  | -8.86                         |
| Ddit4         | -10.60                        | <b>Cdkn1a</b>  | <b>-9.17</b>                  |
| Orm2          | -11.50                        | Cmya1          | -9.56                         |
| Gadd45a       | -11.68                        | Ankrd1         | -9.67                         |
| *S100a9       | -11.98                        | Mustn1         | -10.23                        |
| <b>Cdkn1a</b> | <b>-12.20</b>                 | Ankrd1         | -10.40                        |
| *S100a8       | -14.10                        | <b>Gadd45b</b> | <b>-10.97</b>                 |
| <b>Saa2</b>   | <b>-15.06</b>                 | Axud1          | -11.11                        |
| <b>Saa1</b>   | <b>-15.18</b>                 | Srxn1          | -11.44                        |
| <b>Lcn2</b>   | <b>-27.10</b>                 | Mt1            | -16.84                        |

**Boldface**, NF- $\kappa$ B target genes; \*, up-regulates transcription of genes that are under the control of NF- $\kappa$ B.

**Table S4, related to Figure 3.** The most affected pathways in the liver of SD-fed mice with and without SRT1720 supplementation

| <b>Pathway</b>                 | <b>Z-Score<br/>SD1720:SD</b> |
|--------------------------------|------------------------------|
| RIBOSOMAL_PROTEINS             | 5.66                         |
| CHOLESTEROL_BIOSYNTHESIS       | 4.95                         |
| TERPENOID_BIOSYNTHESIS         | 4.50                         |
| BIOSYNTHESIS_OF_STEROIDS       | 4.10                         |
| MALATEPATHWAY                  | 3.19                         |
| APPEL_IMATINIB_UP              | 3.07                         |
| GUO_HEX_UP                     | 2.61                         |
| DNA_REPLICATION_REACTOME       | 2.45                         |
| ST_GA12_PATHWAY                | 2.15                         |
| SARCOMAS_LIPOSARCOMA_DN        | 2.09                         |
| CIS_RESIST_LUNG_DN             | 1.99                         |
| SETPATHWAY                     | 1.76                         |
| TGFBETA_C4_UP                  | 1.73                         |
| TCYTOTOXICPATHWAY              | -1.13                        |
| LIZUKA_G2_SM_G3                | -1.31                        |
| TCRMOLECULE                    | -1.36                        |
| ADIPOGENESIS_HMSC_CLASS5_UP    | -1.39                        |
| ST_IL_13_PATHWAY               | -1.44                        |
| ST_INTERLEUKIN_13_PATHWAY      | -1.44                        |
| STRIATED_MUSCLE_CONTRACTION    | -1.55                        |
| HIVNEFPATHWAY                  | -1.57                        |
| UBIQUITIN_MEDIATED_PROTEOLYSIS | -1.76                        |
| FSH_GRANULOSA_DN               | -2.00                        |
| LH_GRANULOSA_DN                | -2.00                        |
| PYRIMIDINE_METABOLISM          | -2.14                        |
| REN_E2F1_TARGETS               | -2.22                        |

|                                         |       |
|-----------------------------------------|-------|
| FLECHNER_KIDNEY_TRANSPLANT_REJECTION_DN | -2.42 |
| SCHUMACHER_MYC_UP                       | -2.68 |
| GLUTAMATE_METABOLISM                    | -2.82 |
| TAKEDA_NUP8_HOXA9_3D_UP                 | -3.00 |
| IFNALPHA_HCC_UP                         | -3.19 |
| ET743_RESIST_UP                         | -3.21 |
| MYOD_NIH3T3_UP                          | -3.46 |
| HEATSHOCK_YOUNG_UP                      | -3.55 |
| BYSTRYKH_HSC_BRAIN_TRANS_GLOCUS         | -4.02 |
| RADAEVA_IFNA_UP                         | -4.37 |
| ICHIBA_GVHD                             | -4.39 |
| IL22BPPATHWAY                           | -4.65 |
| IFNALPHA_NL_UP                          | -5.05 |

---

**Table S5, related to Figure 3.** The most affected pathways in the muscle of SD-fed mice with and without SRT1720 supplementation.

See excel file.

**Table S6, related to Figure 4. List of the most highly expressed genes that were significantly up- and down-regulated by SRT1720 treatment in wild-type (WT) MEF cells.**

This list of genes was sorted using *Sirt1*-KO MEFs for comparison. The last column indicates whether the SRT1720-mediated change observed for a given gene is significantly different between WT and *SIRT1*-KO MEFs.

| Accession      | Symbol  | MEF WT                 | MEF <i>Sirt1</i> -KO   | KO:WT     |
|----------------|---------|------------------------|------------------------|-----------|
|                |         | (zratio)<br>SRT1720:UT | (zratio)<br>SRT1720:UT | (p value) |
| NM_008216.2    | Has2    | 11.98                  | 4.20                   | 4.95E-05  |
| NM_010217.1    | Ctgf    | 10.15                  | 8.70                   | 0         |
| NM_010496.2    | Id2     | 10.03                  | 8.07                   | 0.499     |
| NM_139307.2    | Vasn    | 7.85                   | <i>0.93</i>            | 0.0005    |
| NM_145535.1    | Sdcbp2  | 7.34                   | <i>3.64</i>            | 0         |
| NM_010495.2    | Id1     | 7.30                   | 9.15                   | 0         |
| NM_011607.2    | Tnc     | 6.90                   | <i>-0.53</i>           | 0         |
| NM_011580.3    | Thbs1   | <b>6.65</b>            | <b>-3.54</b>           | 0         |
| NM_001039090.1 | Skil    | 6.59                   | <i>3.29</i>            | 3.03E-09  |
| NM_009397.2    | Tnfaip3 | <b>6.48</b>            | <i>1.34</i>            | 2.43E-05  |
| NM_009943.2    | Cox6a2  | -6.40                  | <i>-0.47</i>           | 6.31E-09  |
| NM_025378.2    | Ifitm3  | -6.50                  | <i>-0.08</i>           | 0         |
| NM_019738.1    | Nupr1   | -6.71                  | <i>3.46</i>            | 0         |
| NM_016974.1    | Dbp     | -6.95                  | <i>-1.17</i>           | 0         |
| NM_011333.3    | Ccl2    | <b>-7.65</b>           | <b>1.86</b>            | 0         |
| NM_007837.2    | Ddit3   | -8.04                  | <i>2.03</i>            | 3.22E-12  |
| NM_007836.1    | Gadd45a | -8.12                  | <i>0.40</i>            | 9.08E-14  |
| NM_011315.3    | Saa3    | <b>-8.33</b>           | <b>-3.43</b>           | 0.533     |
| NM_013654.2    | Ccl7    | <b>-8.39</b>           | <i>1.38</i>            | 0         |

**Boldface**, NF- $\kappa$ B target genes; *Italics*, no significant changes versus untreated (UT) cells.

**Table S7, related to Figure 4. Partial list of signaling proteins involved in NF- $\kappa$ B activation with altered phosphorylation in response to SRT1720.**

Wild-type (WT) and *Sirt1*-KO MEFs were incubated with vehicle or 3 mM SRT1720 for 18 h, after which total lysates were subjected to phospho-antibody microarray analysis. The signal intensities of phosphorylated and total forms of each protein were determined, and the ratio (phospho/total) of each protein was calculated between vehicle (UT)- and SRT1720-treated MEFs. 95% confidence interval (CI) was determined to demonstrate the significance of the signal alteration for each protein. The impact of site-specific phosphorylation on the biological function of these proteins is shown.

|                                      | Ratio (MEF WT) |             | Ratio (MEF KO) |             | Function*                              |
|--------------------------------------|----------------|-------------|----------------|-------------|----------------------------------------|
|                                      | SRT/UT         | 95% CI      | SRT/UT         | 95% CI      |                                        |
| I $\kappa$ B $\alpha$ (Ser(P)-32/36) | 1.66           | [1.41-1.91] | 0.80           | [0.61-0.99] | Inactivation<br>(Winston et al., 1999) |
| IKK- $\alpha/\beta$ (Ser(P)-180/181) | 0.91           | [0.86-0.96] | 0.85           | [0.39-1.31] | Activation<br>(Karin, 1999)            |
| IKK- $\alpha$ (Thr(P)-23)            | 0.34           | [0.26-0.42] | 0.92           | [0.81-1.03] | Activation<br>(Ozes et al., 1999)      |
| NF- $\kappa$ B-p105/p50 (Ser(P)-907) | 0.60           | [0.54-0.66] | 1.00           | [0.67-1.33] | Stability<br>(Demarchi et al., 2003)   |
| NF- $\kappa$ B-p65 (Ser(P)-311)      | 0.24           | [0.22-0.26] | 0.72           | [0.63-0.81] | Activation<br>(Chang et al., 2011)     |

\* Supporting references



## SUPPLEMENTAL REFERENCES

Chang, Y., Levy, D., Horton, J.R., Peng, J., Zhang, X., Gozani, O., and Cheng, X. (2011). Structural basis of SETD6-mediated regulation of the NF- $\kappa$ B network via methyl-lysine signaling. *Nucleic Acids Research* 39, 6380-6389.

Cheadle, C., Vawter, M.P., Freed, W.J., and Becker, K.G. (2003). Analysis of Microarray Data Using Z Score Transformation. *The Journal of Molecular Diagnostics* 5, 73-81

Demarchi, F., Bertoli, C., Sandy, P., and Schneider, C. (2003). Glycogen synthase kinase-3 $\beta$  regulates NF- $\kappa$ B1/p105 stability. *Journal of Biological Chemistry* 278, 39583-39590.

Karin, M. (1999). Positive and negative regulation of I $\kappa$ B kinase activity through IKK $\beta$  subunit phosphorylation. *Science* 284, 309-313.

Kim, S.Y., and Volsky, D.J. (2005). PAGE: Parametric analysis of gene set enrichment. *BMC Bioinformatics* 6, 1471-2105

Lee, C., Raffaghello, L., Brandhorst, S., Safdie, F.M., Bianchi, G., Martin-Montalvo, A., Pistoia, V., Wei, M., Hwang, S., Merlino, A., *et al.* (2012). Fasting Cycles Retard Growth of Tumors and Sensitize a Range of Cancer Cell Types to Chemotherapy. *Science Translational Medicine* 4, 124ra127

Ozes, O.N., Mayo, L.D., Gustin, J.A., Pfeffer, S.R., Pfeffer, L.M., and Donner, D.B. (1999). NF- $\kappa$ B activation by tumour necrosis factor requires the Akt serine-threonine kinase. *Nature* 401, 82-85

Winston, J.T., Strack, P., Beer-Romero, P., Chu, C.Y., Elledge, S.J., and Harper, J.W. (1999). The SCF $\beta$ -TRCP-ubiquitin ligase complex associates specifically with phosphorylated destruction motifs in I $\kappa$ B $\alpha$  and  $\beta$ -catenin and stimulates I $\kappa$ B $\alpha$  ubiquitination in vitro. *Genes & Development* 13, 270-283
